# Supplementary material for: A phase 1 study of the safety, tolerability, pharmacodynamics, and pharmacokinetics of tenapanor in healthy Japanese volunteers
Source: Springer Nature journal article supplement (doi:10.1007/s10157-016-1302-8), 2016-07-01
Supplement: MOESM1 [file 10321162]

## **A phase 1 study of the safety, tolerability, pharmacodynamics, and pharmacokinetics of tenapanor in healthy Japanese volunteers**

### **Authors**

Susanne Johansson, David P. Rosenbaum, Mikael Knutsson, Maria Leonsson-Zachrisson

S. Johansson, M. Knutsson, M. Leonsson-Zachrisson

AstraZeneca Gothenburg, Mölndal, Sweden

D. Rosenbaum

Ardelyx Inc., Fremont, CA, USA

### **Corresponding author:**

David P. Rosenbaum

Ardelyx, Inc.

34175 Ardenwood Blvd, Suite 200

Fremont, CA 94555, USA

Email: [drosenbaum@ardelyx.com](mailto:drosenbaum@ardelyx.com)

Phone: +1 510 745 1752

**Supplementary Table S1.** Blood pressure and clinical chemistry values for healthy Japanese individuals receiving repeated doses of tenapanor or placebo

|                                       |          | Repeated-dose groups <sup>a</sup>             |                                               |                                               |                                               |                             |
|---------------------------------------|----------|-----------------------------------------------|-----------------------------------------------|-----------------------------------------------|-----------------------------------------------|-----------------------------|
|                                       |          | Tenapanor<br>15 mg b.i.d.<br>( <i>n</i> = 12) | Tenapanor<br>30 mg b.i.d.<br>( <i>n</i> = 12) | Tenapanor<br>60 mg b.i.d.<br>( <i>n</i> = 12) | Tenapanor<br>90 mg b.i.d.<br>( <i>n</i> = 12) | Placebo<br>( <i>n</i> = 12) |
| Systolic blood pressure (mmHg)        | Baseline | 107.4 ± 8.51                                  | 109.4 ± 7.25                                  | 103.3 ± 10.02                                 | 107.2 ± 9.32                                  | 106.8 ± 8.47                |
|                                       | Day 8    | 111.7 ± 12.48                                 | 113.2 ± 10.25                                 | 104.8 ± 9.69                                  | 111.3 ± 13.67                                 | 110.3 ± 12.26               |
| Diastolic blood pressure (mmHg)       | Baseline | 62.1 ± 7.86                                   | 63.1 ± 7.84                                   | 59.9 ± 5.00                                   | 59.7 ± 4.83                                   | 60.8 ± 7.43                 |
|                                       | Day 8    | 66.1 ± 7.14                                   | 65.5 ± 8.55                                   | 61.8 ± 5.80                                   | 64.0 ± 8.55                                   | 66.1 ± 9.92                 |
| Serum sodium (mmol/L) <sup>b</sup>    | Baseline | 141.3 ± 2.15                                  | 140.2 ± 1.19                                  | 141.3 ± 1.15                                  | 140.9 ± 1.51                                  | 139.5 ± 1.81                |
|                                       | Day 8    | 140.6 ± 1.51                                  | 139.4 ± 1.68                                  | 139.8 ± 1.36                                  | 138.9 ± 0.90                                  | 139.6 ± 1.29                |
| Serum phosphorus (mg/dL) <sup>b</sup> | Baseline | 3.67 ± 0.440                                  | 3.68 ± 0.256                                  | 4.03 ± 0.458                                  | 4.07 ± 0.416                                  | 3.94 ± 0.472                |
|                                       | Day 8    | 3.88 ± 0.331                                  | 3.89 ± 0.211                                  | 4.31 ± 0.429                                  | 4.29 ± 0.462                                  | 4.16 ± 0.492                |
| Serum calcium (mg/dL) <sup>b</sup>    | Baseline | 9.75 ± 0.421                                  | 9.68 ± 0.205                                  | 9.76 ± 0.275                                  | 9.84 ± 0.275                                  | 9.76 ± 0.294                |
|                                       | Day 8    | 9.68 ± 0.333                                  | 9.73 ± 0.299                                  | 9.80 ± 0.286                                  | 9.62 ± 0.279                                  | 9.72 ± 0.340                |

Data shown are mean ± standard deviation.

<sup>a</sup>Dosing over 7 days.

<sup>b</sup>Placebo, *n* = 11

*b.i.d.* twice daily
